# Supplementary figures and images for: Structural, spectroscopic and electrochemical studies of nickel(II) “sandwich” complexes with ligands featuring tethered 1,4,7-triazacyclononane macrocycles †
Source: Royal Society of Chemistry journal article supplement (doi:10.1039/b101766g), 2001-01-01

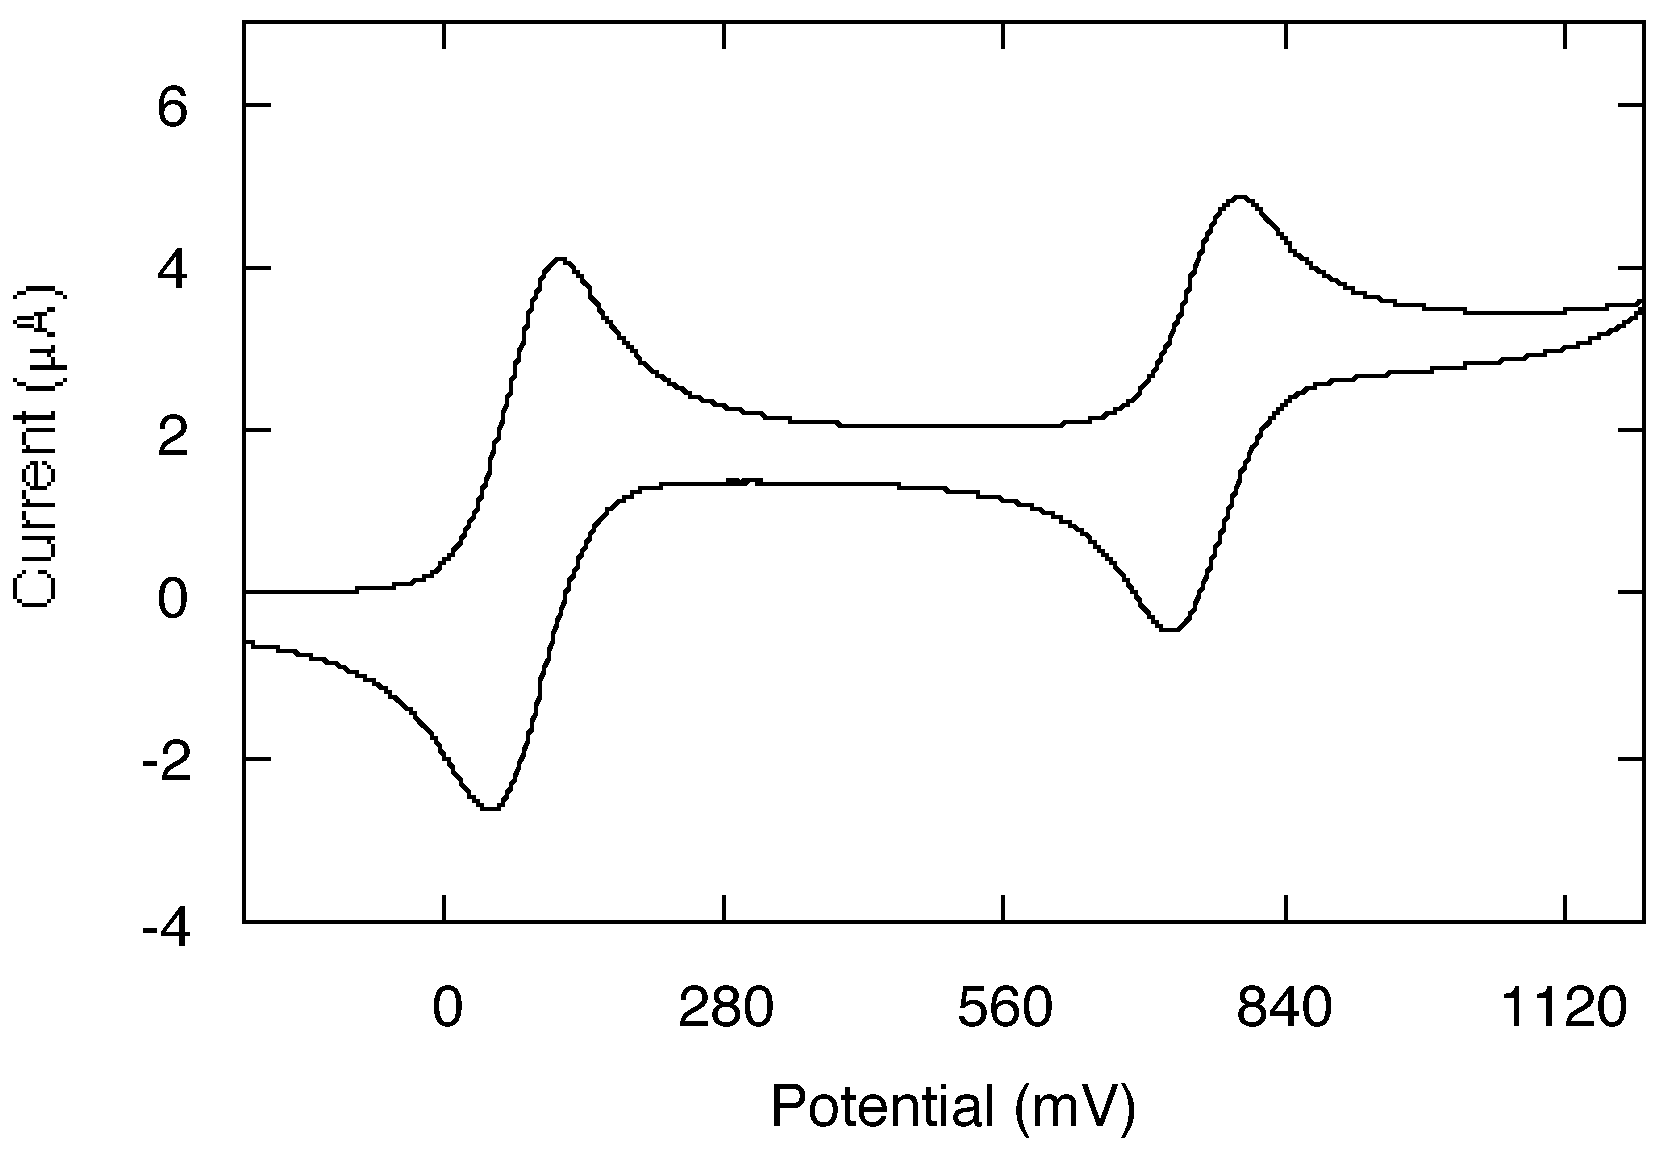


**Supplementary Figure 1**


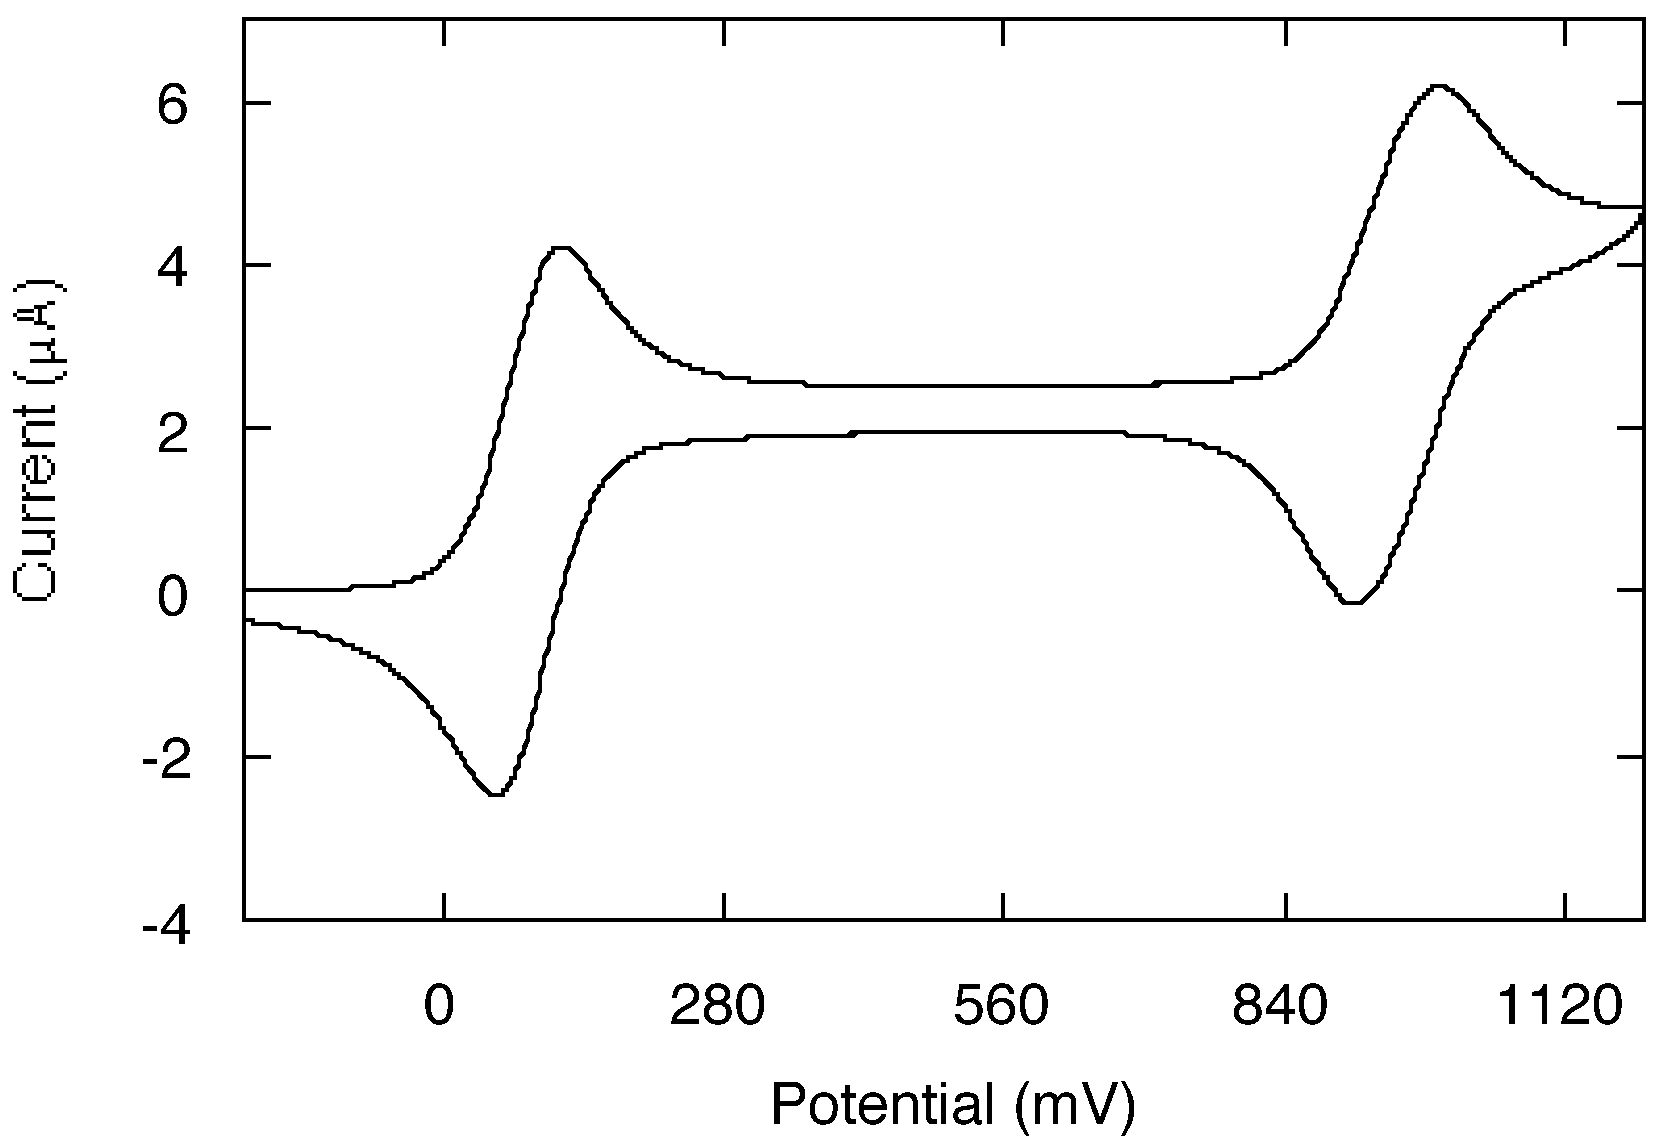


**Supplementary Figure 2**

Supplement: b101766g.doc [file b101766g.doc]
